# Supplementary material for: Patients with SARS-CoV-2-Induced Viral Sepsis Simultaneously Show Immune Activation, Impaired Immune Function and a Procoagulatory Disease State
Source: MDPI journal article supplement (doi:10.3390/vaccines11020435), 2023-02-13
Supplement: s1 [file s1]

## Supplementary Material

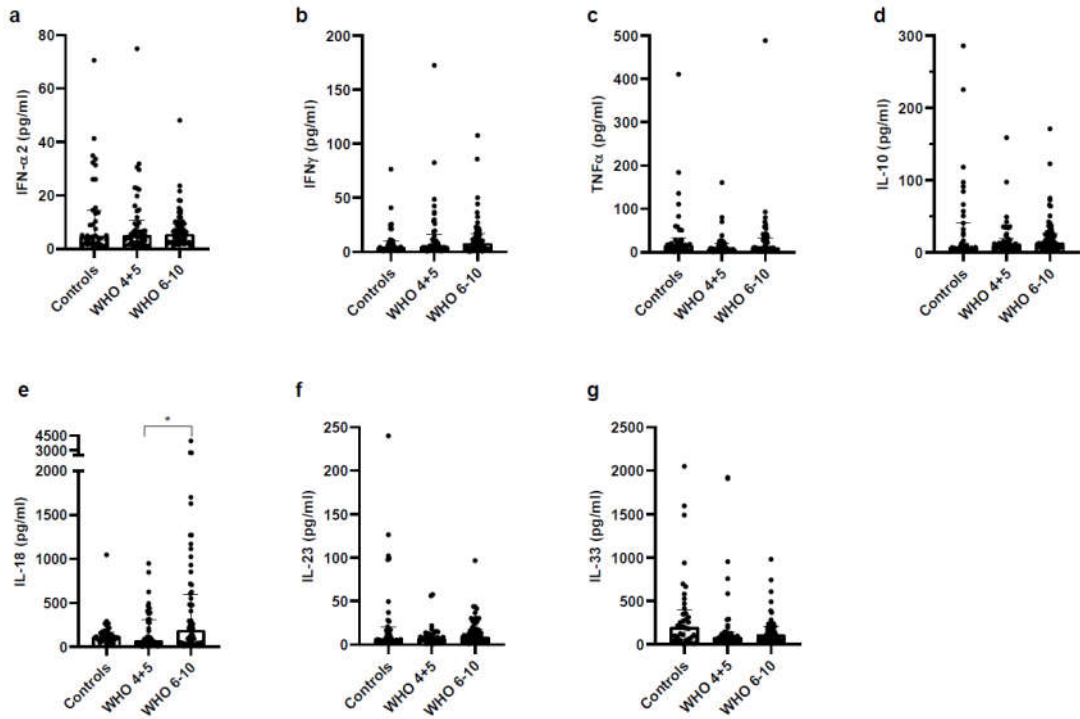

**Figure S1.** Additional pro-inflammatory cytokines. Platelet-free heparinized plasma of healthy controls, non-severe-COVID-19 and severe-COVID-19 patients was analysed using a LegendPlex panel and measured on a Cytoflex S). Analysis was performed according to the protocol and use of software from BioLegend. Cytokines measured were a) IFN-α2, b) IFN-γ, c) TNF-α, d) IL-10, e) IL-18, f) IL-23, g) IL-33. Statistical comparison between groups was done by using Kruskal Wallis. All changes observed are statistically not significant.

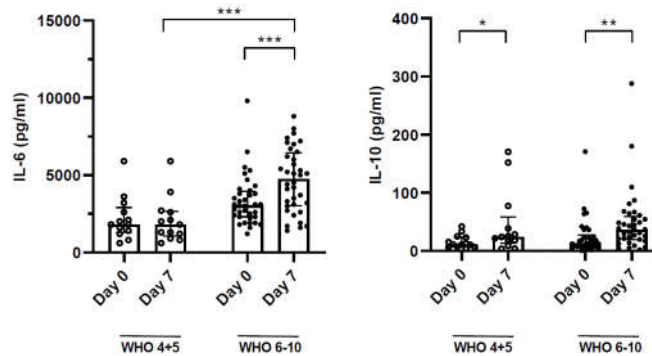

**Figure S2.** Time course of pro- and anti-inflammatory cytokines. Platelet-free heparinized plasma of healthy controls, non-severe-COVID-19 and severe-COVID-19 patients was analysed on day 0 and day 7 using a LegendPlex panel and measured on a Cytoflex S). Analysis was performed according to the protocol and use of software from BioLegend. Cytokines measured were a) IL-6 and b) IL-10. Statistical comparison between groups was done by using Two-way ANOVA (IL-6) and Mixed-effects analysis (IL-10). Unless marked with a p-value, all changes observed are not significant; \* p<0.05; \*\* p<0.01; \*\*\* p<0.001.
